# Supplementary material for: Avian Influenza Virus PB1 Gene in H3N2 Viruses Evolved in Humans To Reduce Interferon Inhibition by Skewing Codon Usage toward Interferon-Altered tRNA Pools
Source: PubMed Central journal article supplement (PMC6030557; doi:10.1128/mbio.01222-18), 2018-07-03
Supplement: mbo004183961s1.pdf [file mbo004183961s1.pdf]

1 Avian influenza PB1 gene in H3N2 viruses evolved in humans to reduce interferon  
2 inhibition by skewing codon usage toward interferon-altered tRNA pools

3

4

## Supplemental Materials and Methods

### 5 The Codon Adaptation Index (CAI)

6 The Codon Adaptation Index (CAI), as described by Sharp and Li (1), was used to  
7 compare codon usage in influenza PB1 mRNAs to human codon usage. The 9,000 full-  
8 length sequences of H1N1, H2N2 and , and H3N2 PB1 segments of influenza A virus  
9 used in this research came from GISAID (<http://gisaid.org>). Acknowledgements for  
10 sequences used in this study are available in Supplemental Material File 1. The  
11 reference set of human genes was comprised of the most highly expressed genes  
12 across at least five tissues, as determined from the Affymetrix Gene Chip Human  
13 Genome U95Av2, which was downloaded from the EMBL-EBI Expression ATLAS  
14 database. The sequences of the 200 most highly expressed human genes across more  
15 than five tissues were downloaded from the NCBI Entrez database. These genes were  
16 used to calculate the RSCU of each codon. The CAI for each H3N2 PB1 mRNA was  
17 calculated and plotted against the circulation time, the number of years the PB1  
18 segment has been circulating in the human population since its introduction in 1968 into  
19 human-infecting H3N2 viruses. To demonstrate that the resulting trend in CAI values is  
20 significant, and not caused by the phylogenetic relationship between influenza A virus  
21 isolates, a reshuffling test was performed whereby the RSCU for each possible codon  
22 was switched to that of a randomly selected synonymous codon. This reshuffling was  
23 done at each position in the alignment of PB1 genes. The CAI for each PB1 gene was

24 then calculated based on these reshuffled RSCU values, and the correlation coefficient  
25 between reshuffled-CAI and year of isolation for the isolates was determined for the first  
26 30 years of virus circulation in humans. The reshuffling test was performed 1,000 times  
27 and the p-value was determined by the proportion of reshuffled tests that produced a  
28 correlation coefficient with an absolute value higher than that which was found in the  
29 original data.

30

### 31 **Cells and viruses.**

32 A549, Calu3 and MDCK cells were grown in Dulbecco's modified Eagle medium  
33 (DMEM) supplemented with 10% heat-inactivated fetal bovine serum. Wild-type (WT)  
34 Ud virus and Ud viruses encoding codon-altered PB1 mRNAs were generated by  
35 plasmid-based reverse genetics as described previously (2, 3). All eight genomic RNA  
36 segments of recombinant viruses were sequenced. Virus stocks were grown in 10-day-  
37 old fertilized eggs, and virus titers were determined by plaque assays in MDCK cells.  
38 For multiple-cycle virus growth, A549 or Calu3 cells were infected with virus at a  
39 multiplicity of infection (moi) of 0.001 PFU/cell. After 1 hour of adsorption at 37°C, the  
40 cells were washed once with phosphate-buffered saline (PBS), replenished with  
41 medium containing 2.5 µg/ml N-acetylated trypsin (NAT), and incubated at 37°C. For  
42 single-cycle growth, A549 cells were infected with virus at a moi of 5 PFU/cell. Growth  
43 curves were carried out in triplicate, with three independent cultures of cells being  
44 infected with virus.

45

46

#### 47 **Codon altered Ud PB1 mRNAs**

48 Constructs #3 and #4 were designed to achieve the same rtAI value of construct #2 by  
49 iteratively changing only those synonymous codons whose isoaccepting tRNAs differed  
50 significantly ( $p$ -adjusted $<0.05$ ) in the tRNA sequencing results between IFN-treated and  
51 untreated cells. The codons to change were determined by a hillclimbing algorithm  
52 available in the codon\_tools python package  
53 ([https://github.com/clauswilke/codon\\_tools](https://github.com/clauswilke/codon_tools)).

54

#### 55 **Immunoblots**

56 Infected cell experiments: A549 cells treated or not treated with IFN (1000U/ml) (Pestka  
57 Biological Laboratories, Piscataway NJ) for 36 hours were infected with WT Ud virus or  
58 a codon-altered Ud virus (constructs #1-#4) at a moi of 1 pfu/cell. Cells were collected 9  
59 hours after infection, and cell extracts were analyzed with immunoblots probed with the  
60 indicated antibodies. Protein bands were quantified using ImageJ (4), with actin bands  
61 used as a loading control. The antibody against the NS1 protein was characterized  
62 previously (5). Rabbit Ab against PB1 was provided by Krister Melen and Ikka Julkunen  
63 (Finnish National Institute for Health and Welfare), and then validated (5). Monoclonal  
64 Abs against PA and PB2 were provided by Juan Ortin (6). The polyclonal goat Ab  
65 against HA, NP and M1 was provided by Robert A. Lamb (7).

66

#### 67 **qPCR measurement of viral RNAs in infected cells**

68 A549 cells treated with IFN (1,000U/ml) or mock treated for 36 hours were infected with  
69 WT Ud virus or construct #1 or construct #2 virus at a moi of 1 pfu/cell. Three hours

70 after infection total RNA was extracted with trizol (Invitrogen). An aliquot of each RNA  
71 sample was reverse transcribed with oligo dT, followed by amplification with the  
72 segment-specific forward and reverse primers listed below to measure mRNA levels by  
73 the Vii7 real-time PCR system using Power SYBR Green PCR Master Mix (Thermo  
74 Fisher Scientific). An equal aliquot of each RNA sample was reverse transcribed using  
75 the segment-specific RT primers listed below, followed by the same amplification  
76 described above to measure vRNA levels by real-time PCR, which was carried out in  
77 triplicate. The mRNA and vRNA levels were normalized with the real-time PCR  
78 measurements of  $\beta$ -actin mRNA levels. The final fold inhibition fold calculated with  
79  $\Delta\Delta$ CT methods.

80

81 **Primers used:**

82 actin reverse primer: GGTCTCAAACATGATCTGGG

83 actin forward primer: GCGACGAGGCCAGAGCAAG

84 PB1 RT primer for vRNA: GAATGGATGTCAACCCGAC

85 PB1 forward Primer: CGAGGAGATCATTGAGCTAAAG

86 PB1 reverse Primer: TTAAGCAGACTTCAGGGATGTG

87 NP vRNA RT primer: GTCCCAAGGCACCAAACGGTCTTATG

88 NP Forward: GAACTTCTGGAGAGGTGAGAATG

89 NP Reverse: GCTCTTTGTGCAGCTGTTTG

90 M vRNA RT primer: GAAAGATGAGCCTTCTGACCG

91 M Forward: CAAATGGTGCAGGCAATGAG

92 M Reverse: CAAGAGGGTCACTTGAATCGT

93  
94  
95  
96  
97  
98  
99  
100  
101  
102  
103  
104  
105  
106  
107  
108  
109  
110  
111  
112  
113  
114  
115

**High-throughput sequencing of tRNAs from IFN-treated and untreated A549 and Calu3 human cells**

Two 15cm tissue culture plates of either A549 or Calu3 cells were treated with IFN to a final concentration 1,000U/mL or with an equal volume of PBS. After 36 hours, total RNA was extracted with trizol, and tRNA was purified using urea-PAGE. The gel was stained with ethidium bromide and the band containing tRNA was excised from the gel. Three samples of each tRNA population were used. tRNA was eluted from the polyacrylamide gel slice by electroelution with D-Tube Dialyzer Midi, MWCO 6-8 kDa (Novagen), and then concentrated by ethanol precipitation. tRNAs were deacylated by incubation in 100ul of 0.1M Tris-HCl (pH 9.0) for 45 minutes at 37°C. Deacetylated tRNAs were concentrated by ethanol precipitation. Libraries were made using the TGIRT template switching reactions as previously described (8). The purity of the libraries was verified using a high sensitivity bioanalyzer. Sequencing was performed by the University of Texas Genomic Sequencing and Analysis Facility on either Illumina HiSeq 4000 or illumina MiSeq machines. Sequencing reads were aligned to the GRCh38 human reference genome with bowtie2, using the default settings and reporting only the best match. Using SAMtools and BEDtools, the intersection of the human reference alignments with a reference set of tRNA genes for GRCh38 (kindly provided by the Alan Lambowitz) was determined, and the read counts for each tRNA gene were determined. Counts for each gene were pooled by anticodon. Differential expression of anticodons was analyzed with the R package DEseq2.

116 **The relative tRNA Adaptation Index (rtAI) and the absolute-rtAI**

117 The first step to calculating rtAI involves finding the sum of all isoaccepting tRNAs for  
118 each codon in the IFN treated and untreated conditions. The isoaccepting tRNAs  
119 (isotRNA) for each codon in each treatment are determined using a table of codon-  
120 anticodon pairings:

$$isotRNA_{i\ IFN} = \sum_{j=1}^{t_i} x_{ij\ IFN-treated}$$

$$isotRNA_{i\ untreated} = \sum_{j=1}^{t_i} x_{ij\ untreated}$$

121 where  $x_{ij}$  is the number of tRNA reads mapped for the  $j$ th tRNA capable of recognizing  
122 the  $i$ th codon for the given treatment condition (either IFN-treated or untreated), and  $t_i$  is  
123 the number of alternative tRNAs that can recognize the  $i$ th codon. The relative  
124 synonymous codon usage by tRNA (RSCUt) of each codon in each treatment is then  
125 calculated as follows:

$$RSCUt_{ih\ IFN-treated} = \frac{isotRNA_{ih\ IFN-treated}}{\sum_{h=1}^{n_h} isotRNA_{ih\ IFN-treated}}$$

$$RSCUt_{ih\ untreated} = \frac{isotRNA_{ih\ untreated}}{\sum_{h=1}^{n_h} isotRNA_{ih\ untreated}}$$

126 where  $isotRNA_{ih}$  the number of isoaccepting tRNAs for the  $i$ th codon for the  $h$ th amino  
127 acid for the given treatment, and  $n_h$  is the number of alternative codons for the  $h$ th  
128 amino acid. The rtAI is then calculated as the mean of the log ratio of the IFN-treated  
129 RSCUt over the untreated RSCUt for each codon across all codons in a gene:

$$rtAI = \frac{\sum_{k=1}^L \log \frac{RSCUt_{k\ IFN-treated}}{RSCUt_{k\ untreated}}}{L}$$

130 where  $\log \frac{RSCUt_{k\ IFN-treated}}{RSCUt_{k\ untreated}}$  is the log ratio of the RSCUt values for the  $k$ th codon in the  
 131 gene and  $L$  is the number of codons in the gene. In our tRNA sequencing experiment,  
 132 there was a single tRNA that was greatly underrepresented, with an average of less  
 133 than 100 reads in each replicate and treatment condition. As we could not expect  
 134 accurate quantification with such a low read number, it was excluded from our analysis.  
 135 This exclusion only has a significant effect on one codon, TTA, for which the  
 136 underrepresented tRNA was the only isoaccepting tRNA, and so this codon was ignored  
 137 in the calculation of rtAI. The rtAI was calculated for the GISAID dataset described  
 138 above. The upwards trend observed in the first 30 years of circulation has a correlation  
 139 coefficient of 0.807. To show that this trend is significant, and not caused by the  
 140 phylogenetic relationship between influenza virus isolates, a reshuffling test was  
 141 performed as described above. The correlation coefficient ( $R$ ) of the non-reshuffled data  
 142 was significantly higher than the correlation coefficients  $R$  of the reshuffled RSCU ( $p =$   
 143 0.043).

144 The calculation of absolute-rtAI is very similar to the calculation for rtAI. The only  
 145 difference is in the upper term that is being summed in the final equation for rtAI.  
 146 Instead of the log ratio of the RSCUt values being averaged across the gene, the  
 147 absolute value of the log ratio is averaged, so the final equation in the determination of  
 148 absolute-rtAI is as follows:

$$rtAI = \frac{\sum_{k=1}^L \left| \log \frac{RSCUt_{k\ IFN-treated}}{RSCUt_{k\ untreated}} \right|}{L}$$

149

150

151

152

153

154

155

## References

156

157

158

159

160

161

162

163

164

165

166

167

168

169

170

171

172

173

174

175

1. **Sharp PM, Li WH.** 1987. The codon Adaptation Index--a measure of directional synonymous codon usage bias, and its potential applications. *Nucleic Acids Res* **15**:1281-1295.
2. **Takeda MP, A.; Shuck, K.,;Pinto, L. H.; and Lamb, R. A.** 2002. Influenza A virus M2 ion channel activity is essential for efficient replication in tissue culture. *J Virol* **76**:1391-1399.
3. **Twu KY, Noah DL, Rao P, Kuo RL, and, Krug RM.** 2006. The CPSF30 binding site on the NS1A protein of influenza A virus is a potential antiviral target. *J. Virol.* **80**:3957-3965.
4. **Abramoff MD, Magalhaes PJ, Ram SJ.** 2004. Image processing with ImageJ. *Biophotonics International* **11**:36-43.
5. **Kuo RL, Zhao C, Malur M, Krug RM.** 2010. Influenza A virus strains that circulate in humans differ in the ability of their NS1 proteins to block the activation of IRF3 and interferon-beta transcription. *Virology* **408**:146-158.
6. **Ochoa M, Barcena J, de la Luna S, Melero JA, Douglas AR, Nieto A, Ortin J, Skehel JJ, Portela A.** 1995. Epitope mapping of cross-reactive monoclonal antibodies specific for the influenza A virus PA and PB2 polypeptides. *Virus Res* **37**:305-315.
7. **Chen BJ, Leser GP, Morita E, Lamb RA.** 2007. Influenza virus hemagglutinin and neuraminidase, but not the matrix protein, are required for assembly and budding of plasmid-derived virus-like particles. *J Virol* **81**:7111-7123.



176 8. **Mohr S, Ghanem E, Smith W, Sheeter D, Qin Y, King O, Polioudakis D, Iyer**  
177 **VR, Hunicke-Smith S, Swamy S, Kuersten S, Lambowitz AM.** 2013.  
178 Thermostable group II intron reverse transcriptase fusion proteins and their use  
179 in cDNA synthesis and next-generation RNA sequencing. *RNA* **19**:958-970.  
180
