# Supplementary material for: Avian Influenza Virus PB1 Gene in H3N2 Viruses Evolved in Humans To Reduce Interferon Inhibition by Skewing Codon Usage toward Interferon-Altered tRNA Pools
Source: PubMed Central journal article supplement (PMC6030557; doi:10.1128/mbio.01222-18), 2018-07-03
Supplement: mbo004183961sf1.pdf [file mbo004183961sf1.pdf]

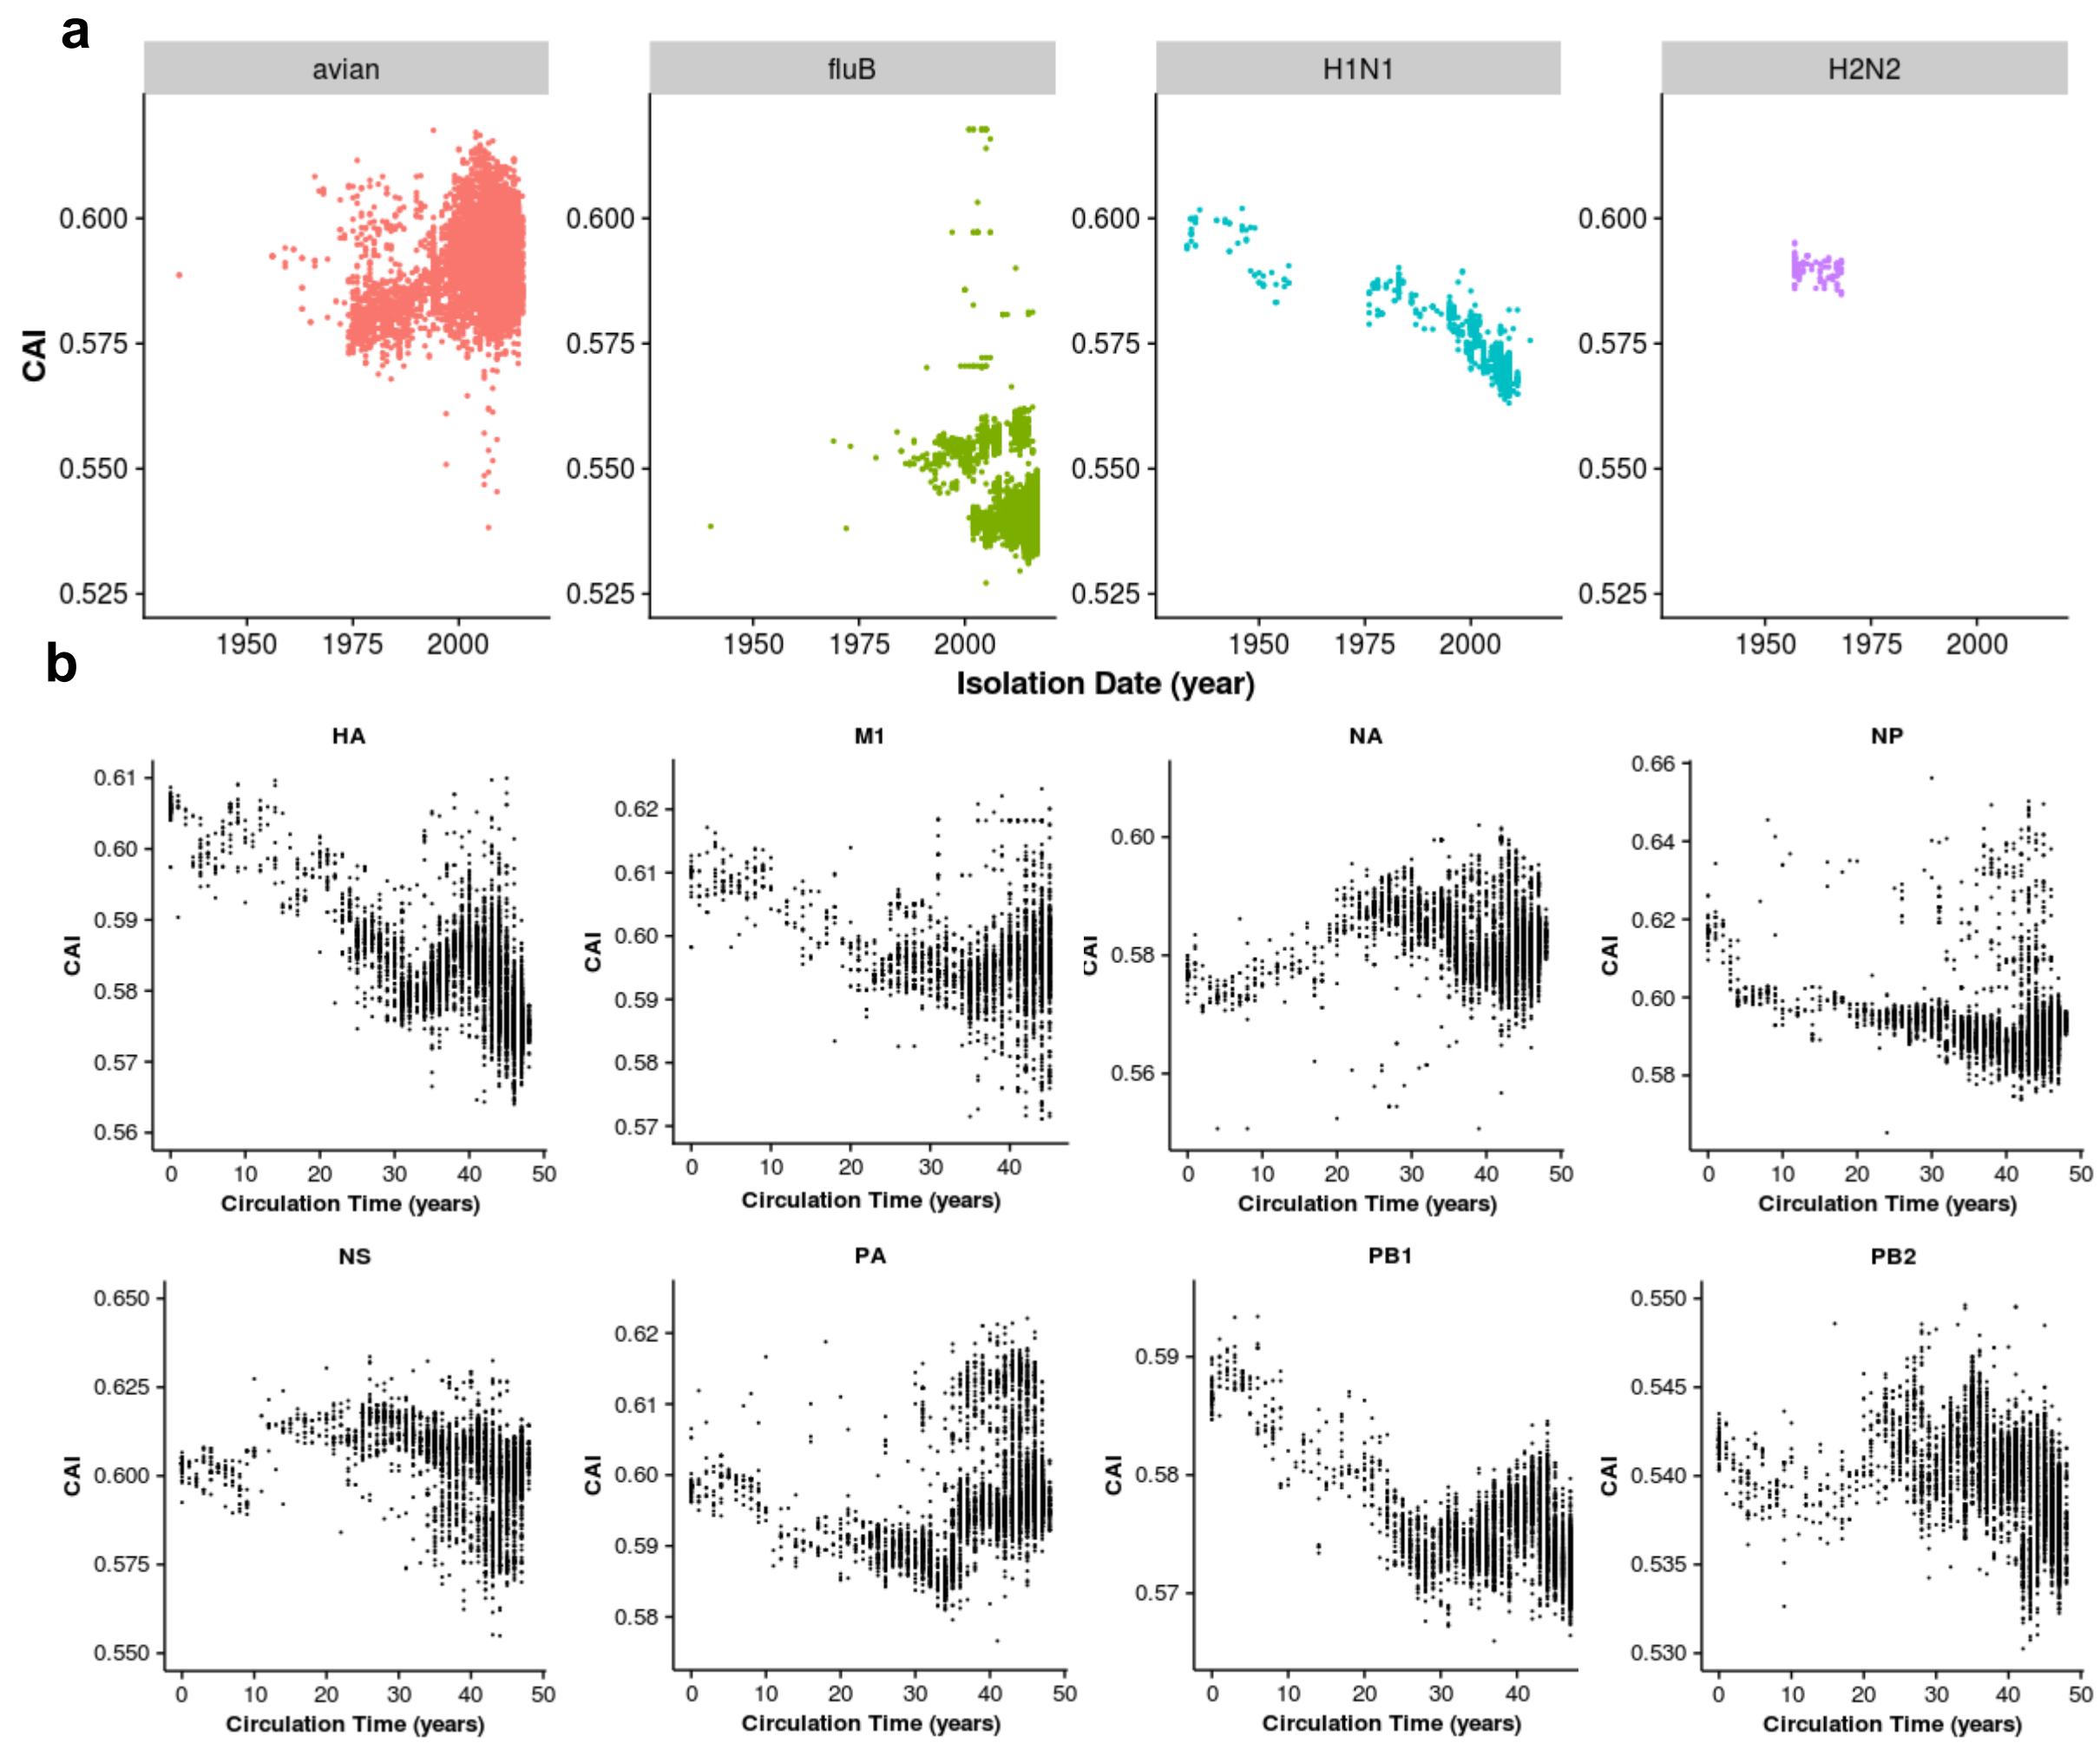

**Figure S1.** The CAI values over time since 1968 for: **a**, avian virus, influenza B virus, H1N1, and H2N2 PB1 genes; and **b**, each segment of H3N2 viruses
