# Supplementary material for: Avian Influenza Virus PB1 Gene in H3N2 Viruses Evolved in Humans To Reduce Interferon Inhibition by Skewing Codon Usage toward Interferon-Altered tRNA Pools
Source: PubMed Central journal article supplement (PMC6030557; doi:10.1128/mbio.01222-18), 2018-07-03
Supplement: mbo004183961sf3.pdf [file mbo004183961sf3.pdf]

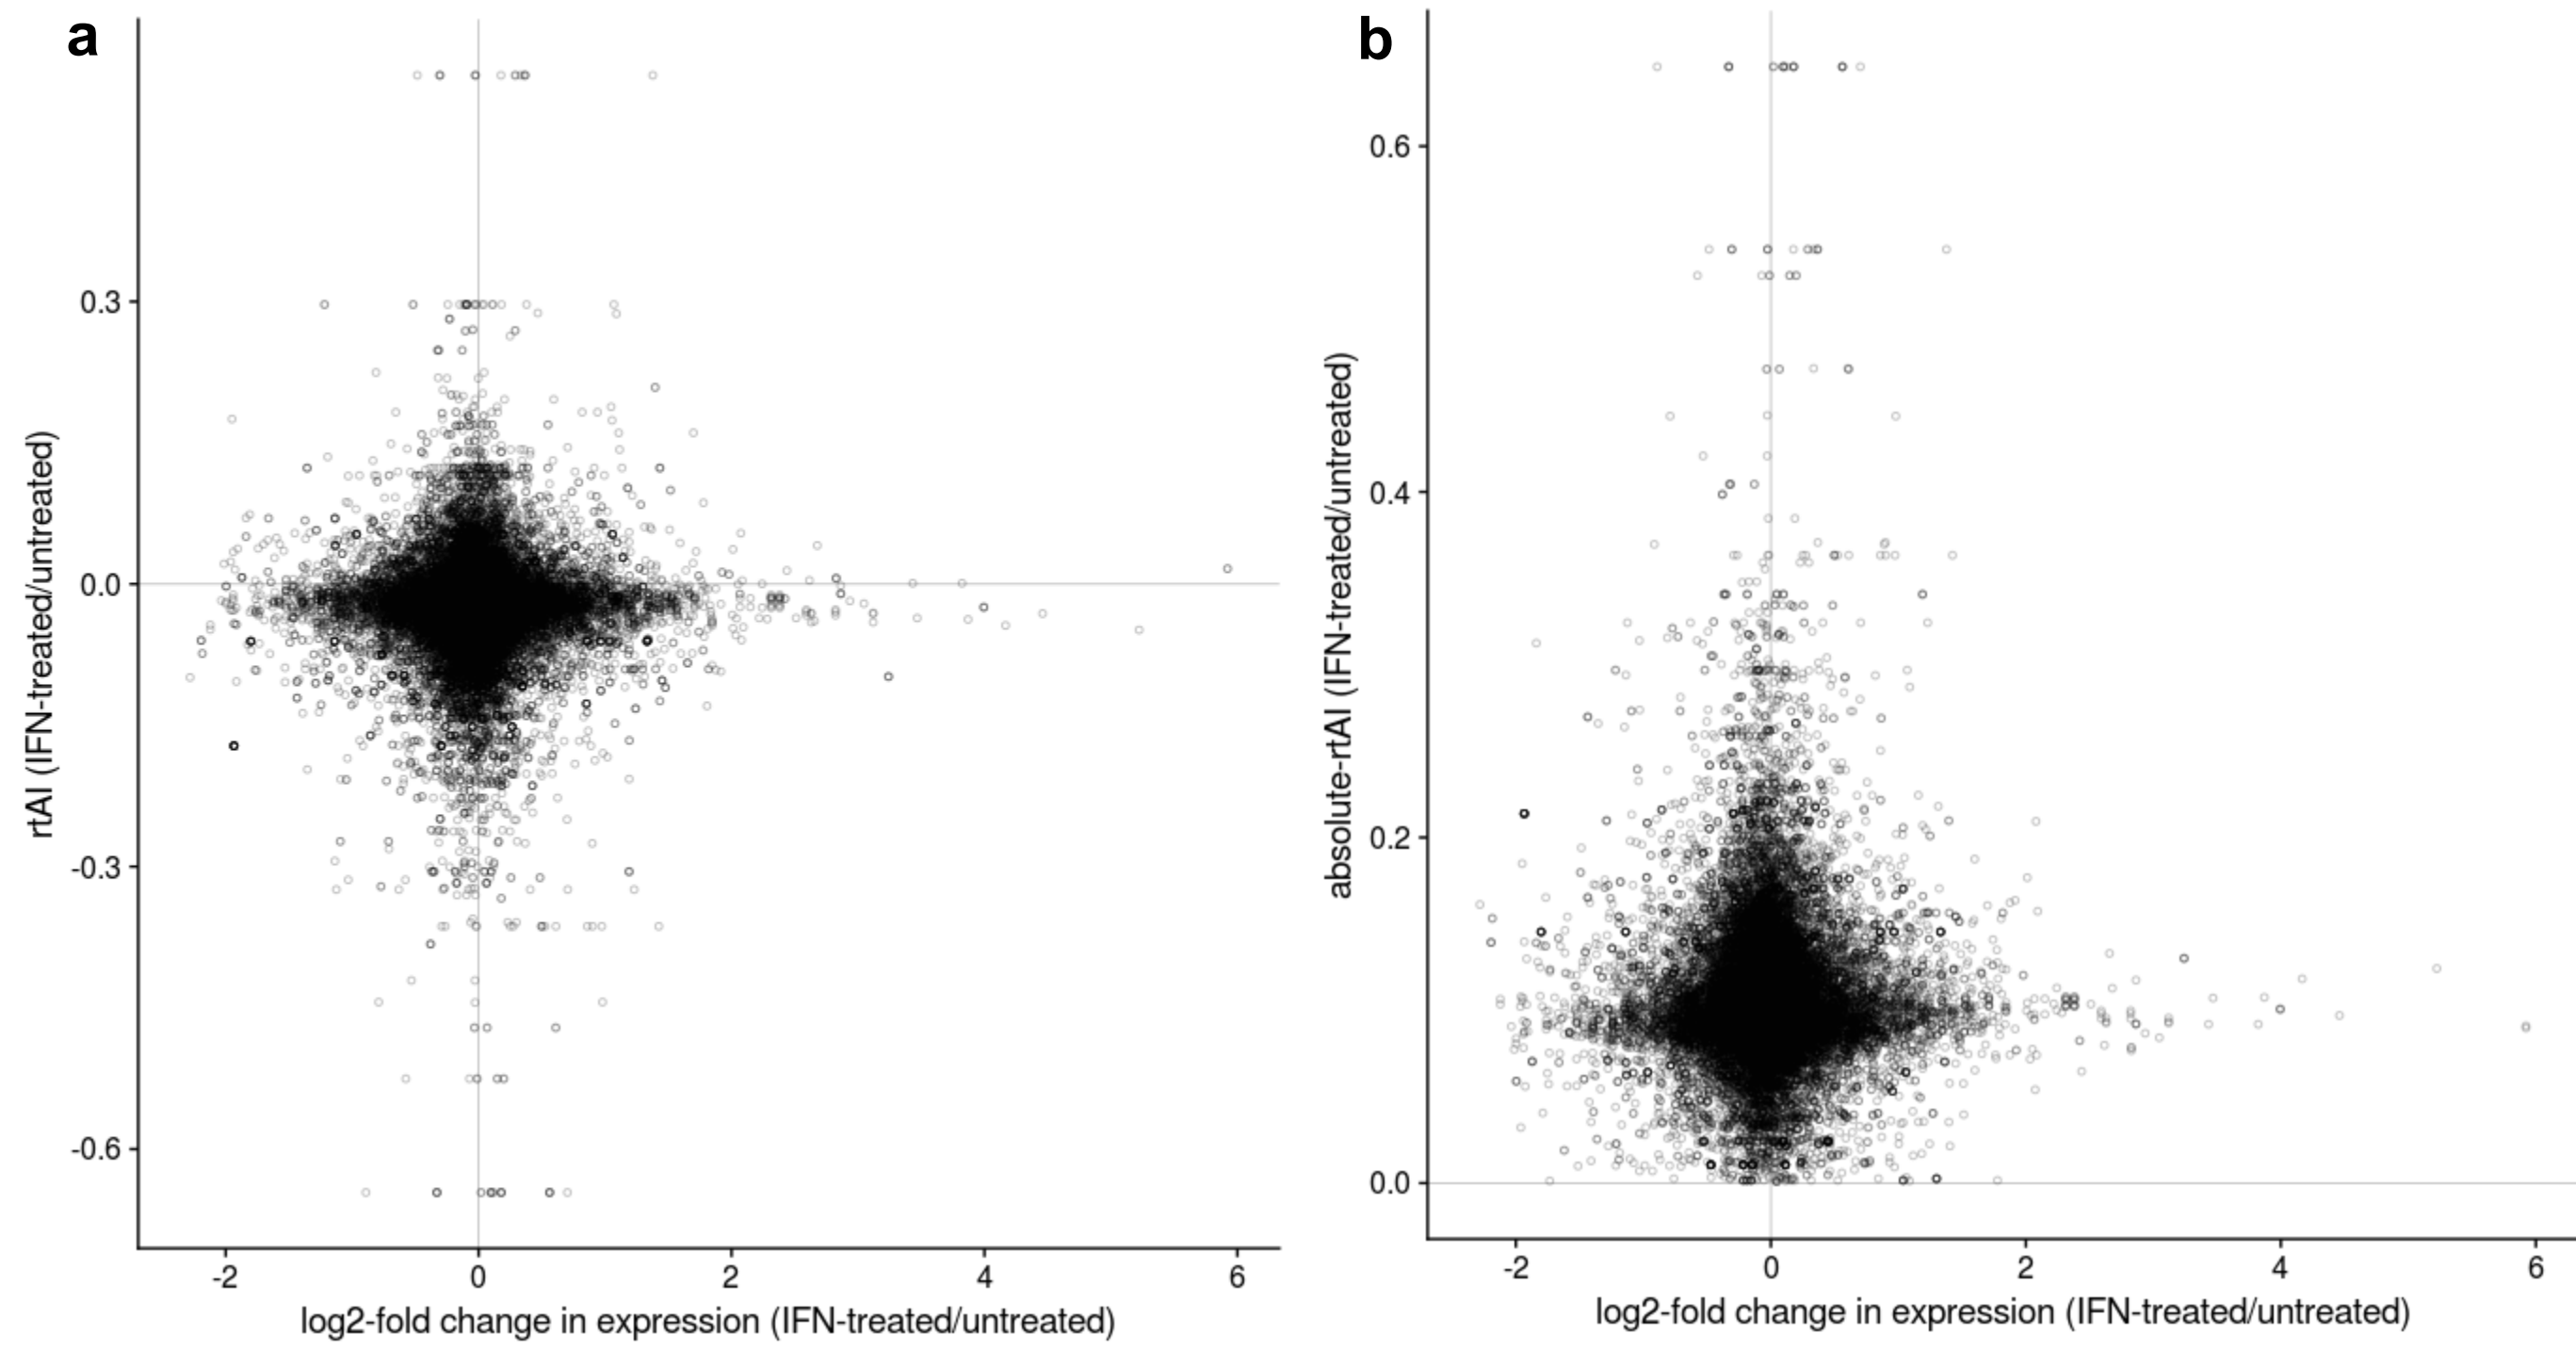

**Figure S3.** **a**, Comparison of the log<sub>2</sub> change in the amount of each human mRNA (both IRG and non-IRG mRNAs) caused by IFN treatment of A549 cells to the rtAI of each mRNA. **b**, Comparison of the log<sub>2</sub> change in the amount of each human mRNA (both IRG and non-IRG mRNAs) caused by IFN treatment of A549 cells to the absolute-rtAI of each mRNA.
